# Supplementary material for: Whole-Genome Phylogenetic Analysis of Influenza B/Phuket/3073/2013-Like Viruses and Unique Reassortants Detected in Malaysia between 2012 and 2014
Source: PubMed Central journal article supplement (PMC5271328; doi:10.1371/journal.pone.0170610), 2017-01-27

# HA - ML Tree

- Hospitalized children (2009-2015)
- Children and adult outpatients (2012-2014) (Oong et al. 2015)
- WHO candidate vaccine strains

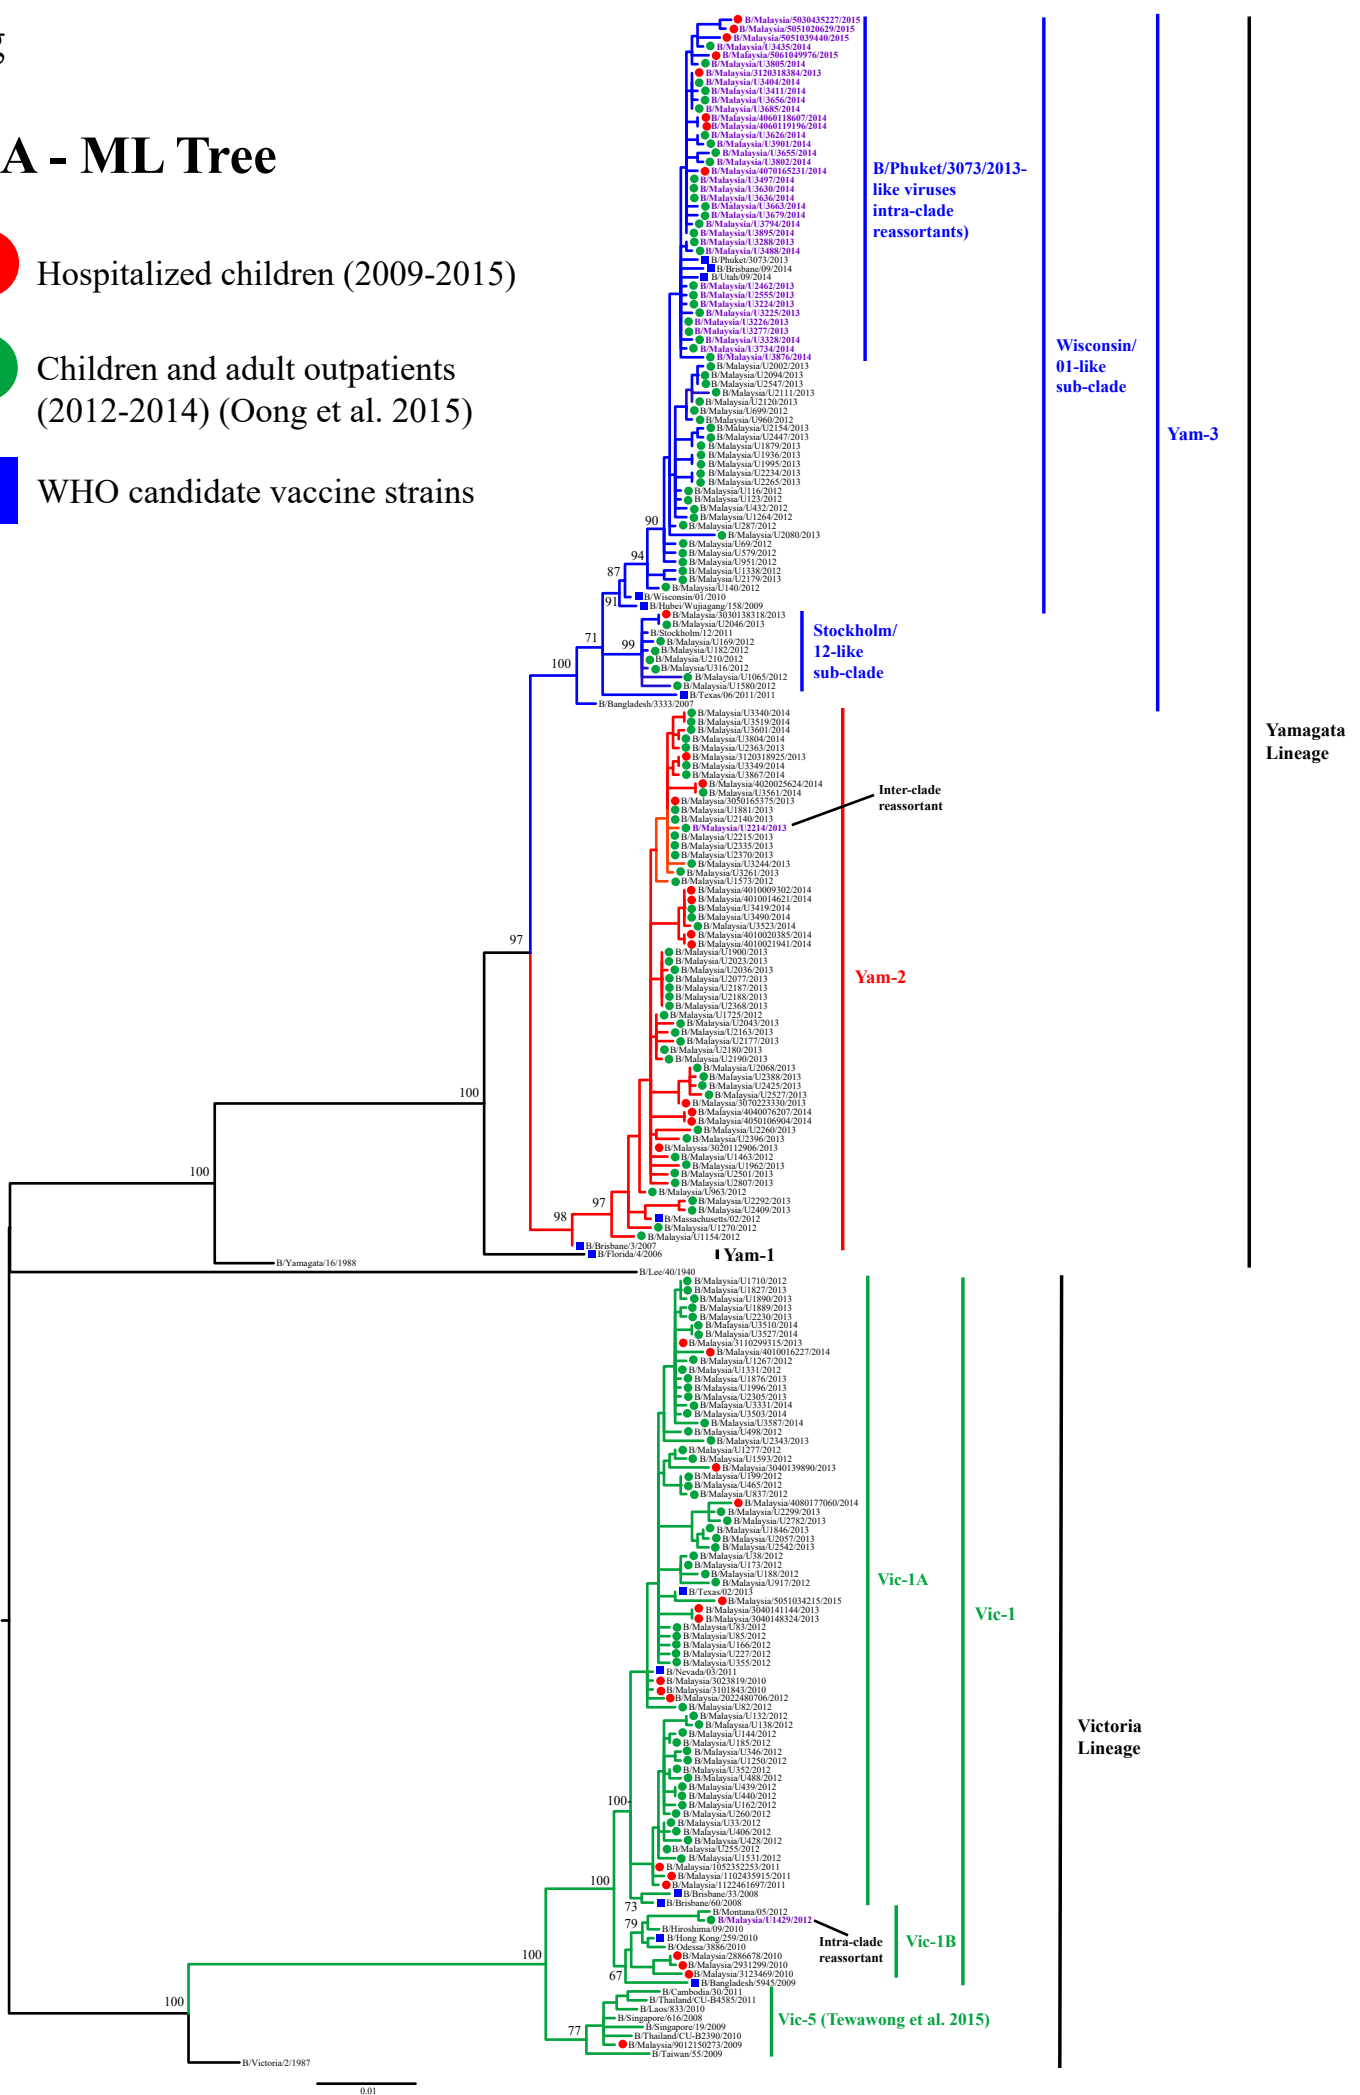

Supplement: pone.0170610.s001.pdf [file pone.0170610.s001.pdf]
