# Supplementary material for: Whole-Genome Phylogenetic Analysis of Influenza B/Phuket/3073/2013-Like Viruses and Unique Reassortants Detected in Malaysia between 2012 and 2014
Source: PubMed Central journal article supplement (PMC5271328; doi:10.1371/journal.pone.0170610), 2017-01-27
Supplement: pone.0170610.s002.pdf [file pone.0170610.s002.pdf]

# NA - ML Tree

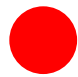

Hospitalized children (2009-2015)

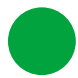

Children and adult outpatients (2012-2014) (Oong et al. 2015)

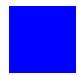

WHO candidate vaccine strains

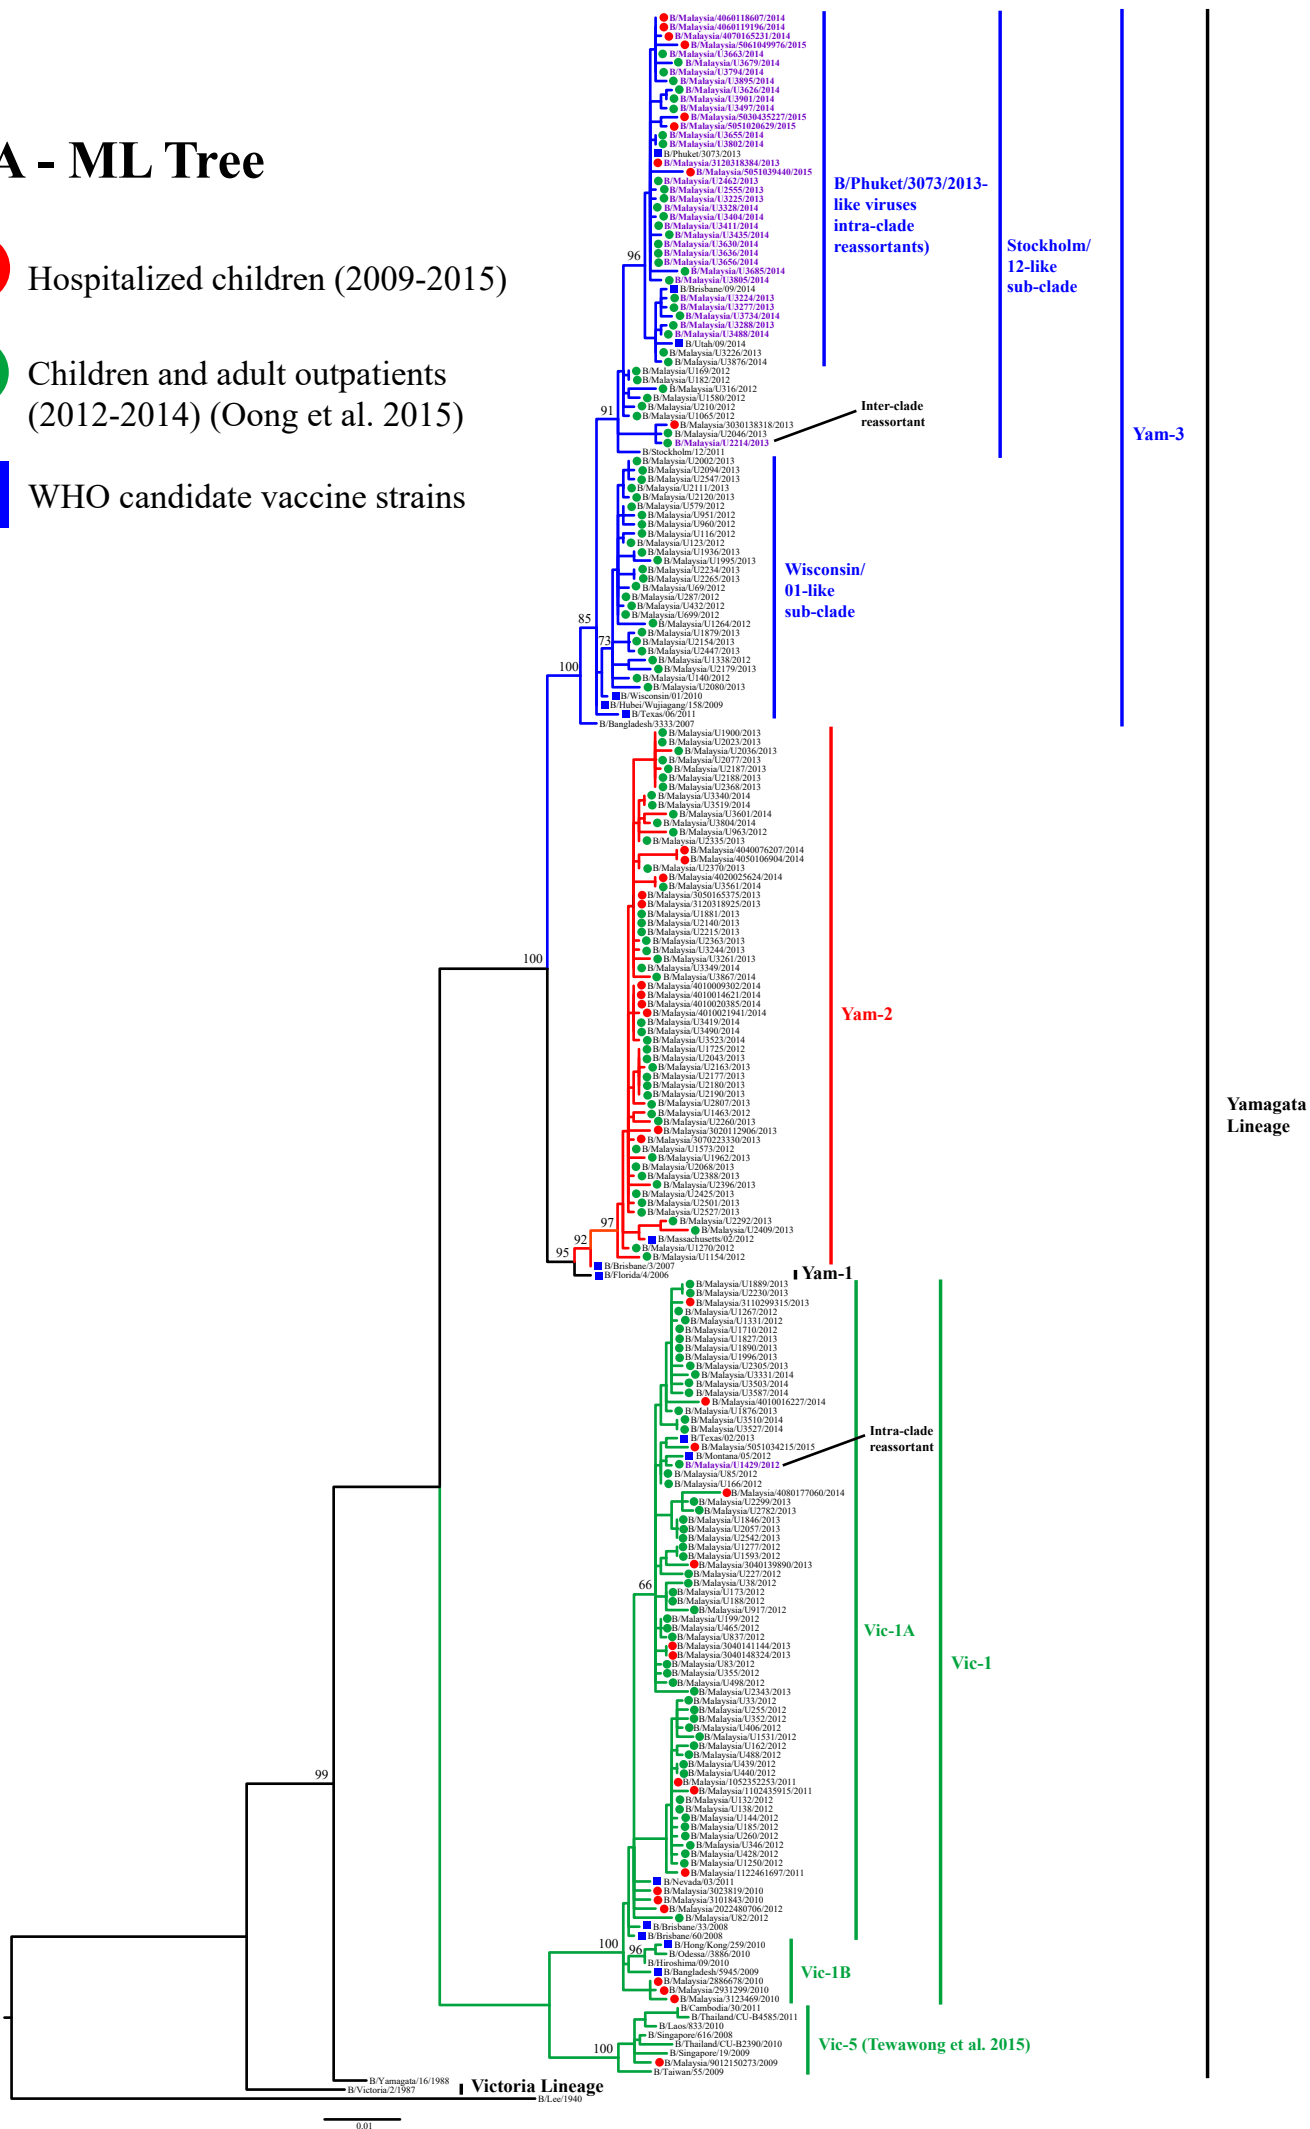

Yam-3

B/Phuket/3073/2013-like viruses intra-clade reassortants)

Stockholm/12-like sub-clade

Wisconsin/01-like sub-clade

Yam-2

Yamagata Lineage

Intra-clade reassortant

Vic-1A

Vic-1

Vic-1B

Vic-5 (Tewong et al. 2015)

Victoria Lineage  
B/Yamagata/16/1988  
B/Victoria/2/1987  
B/Lee/1/940

0.01
