# Supplementary material for: Whole-Genome Phylogenetic Analysis of Influenza B/Phuket/3073/2013-Like Viruses and Unique Reassortants Detected in Malaysia between 2012 and 2014
Source: PubMed Central journal article supplement (PMC5271328; doi:10.1371/journal.pone.0170610), 2017-01-27

# ML Tree - HA (1785bp)

WHO candidate vaccine/  
reference strains

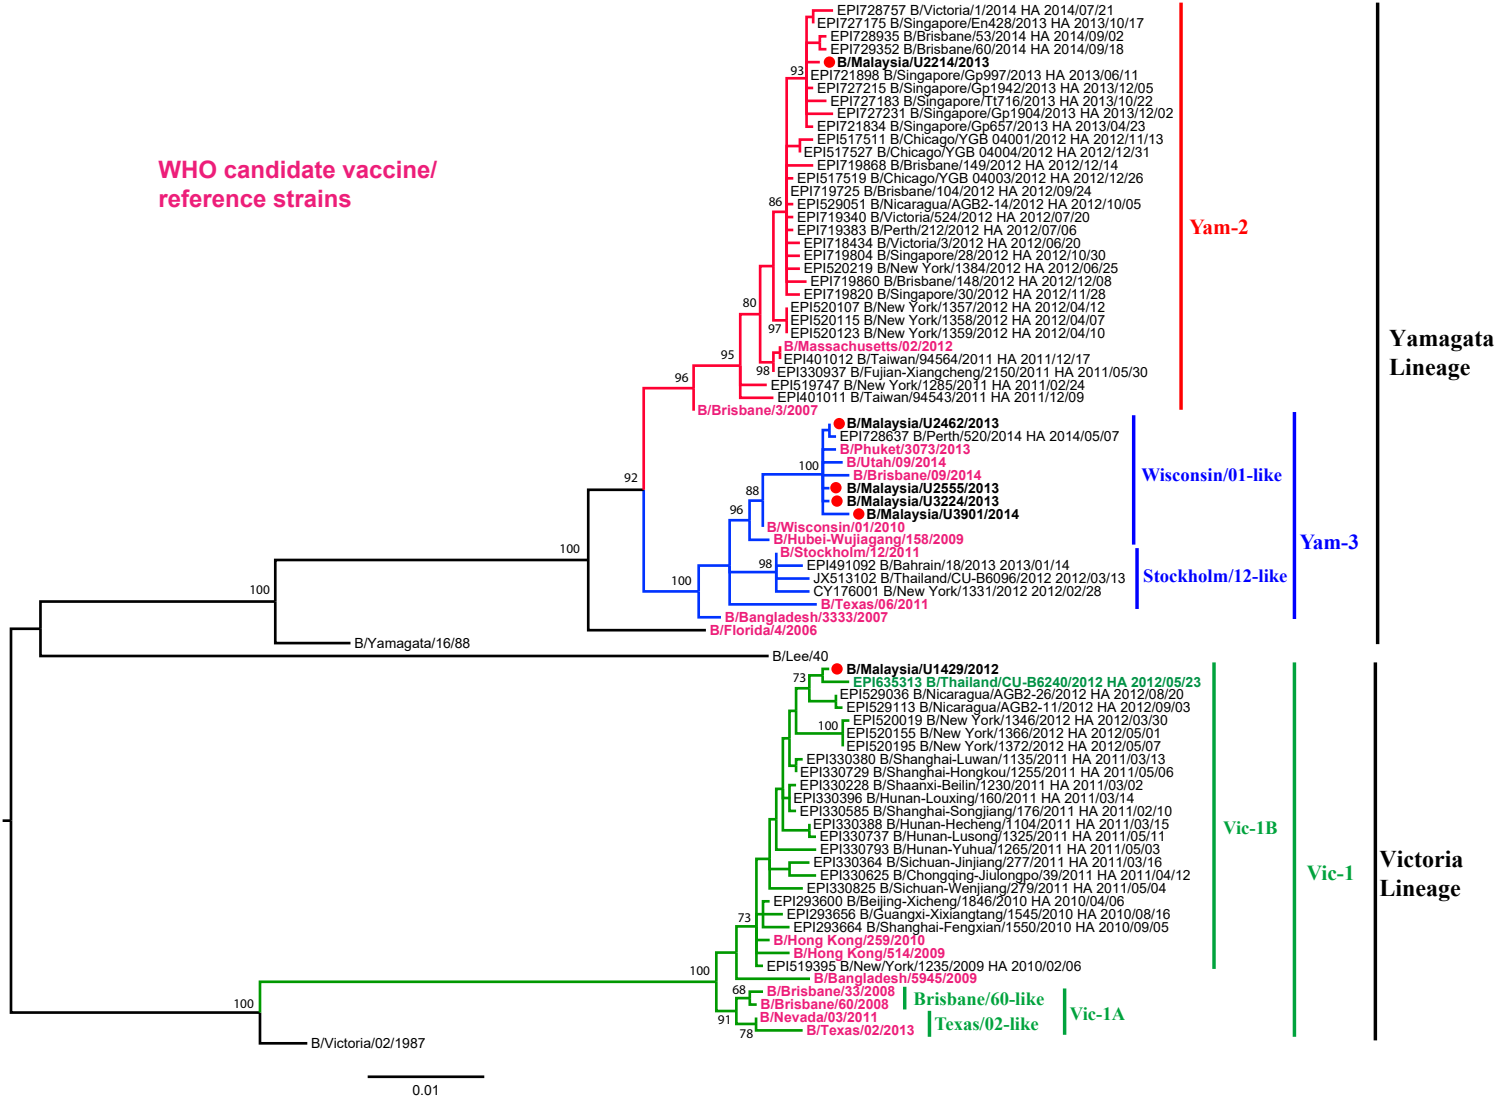

# ML Tree - NA (1401bp)

WHO candidate vaccine/  
reference strains

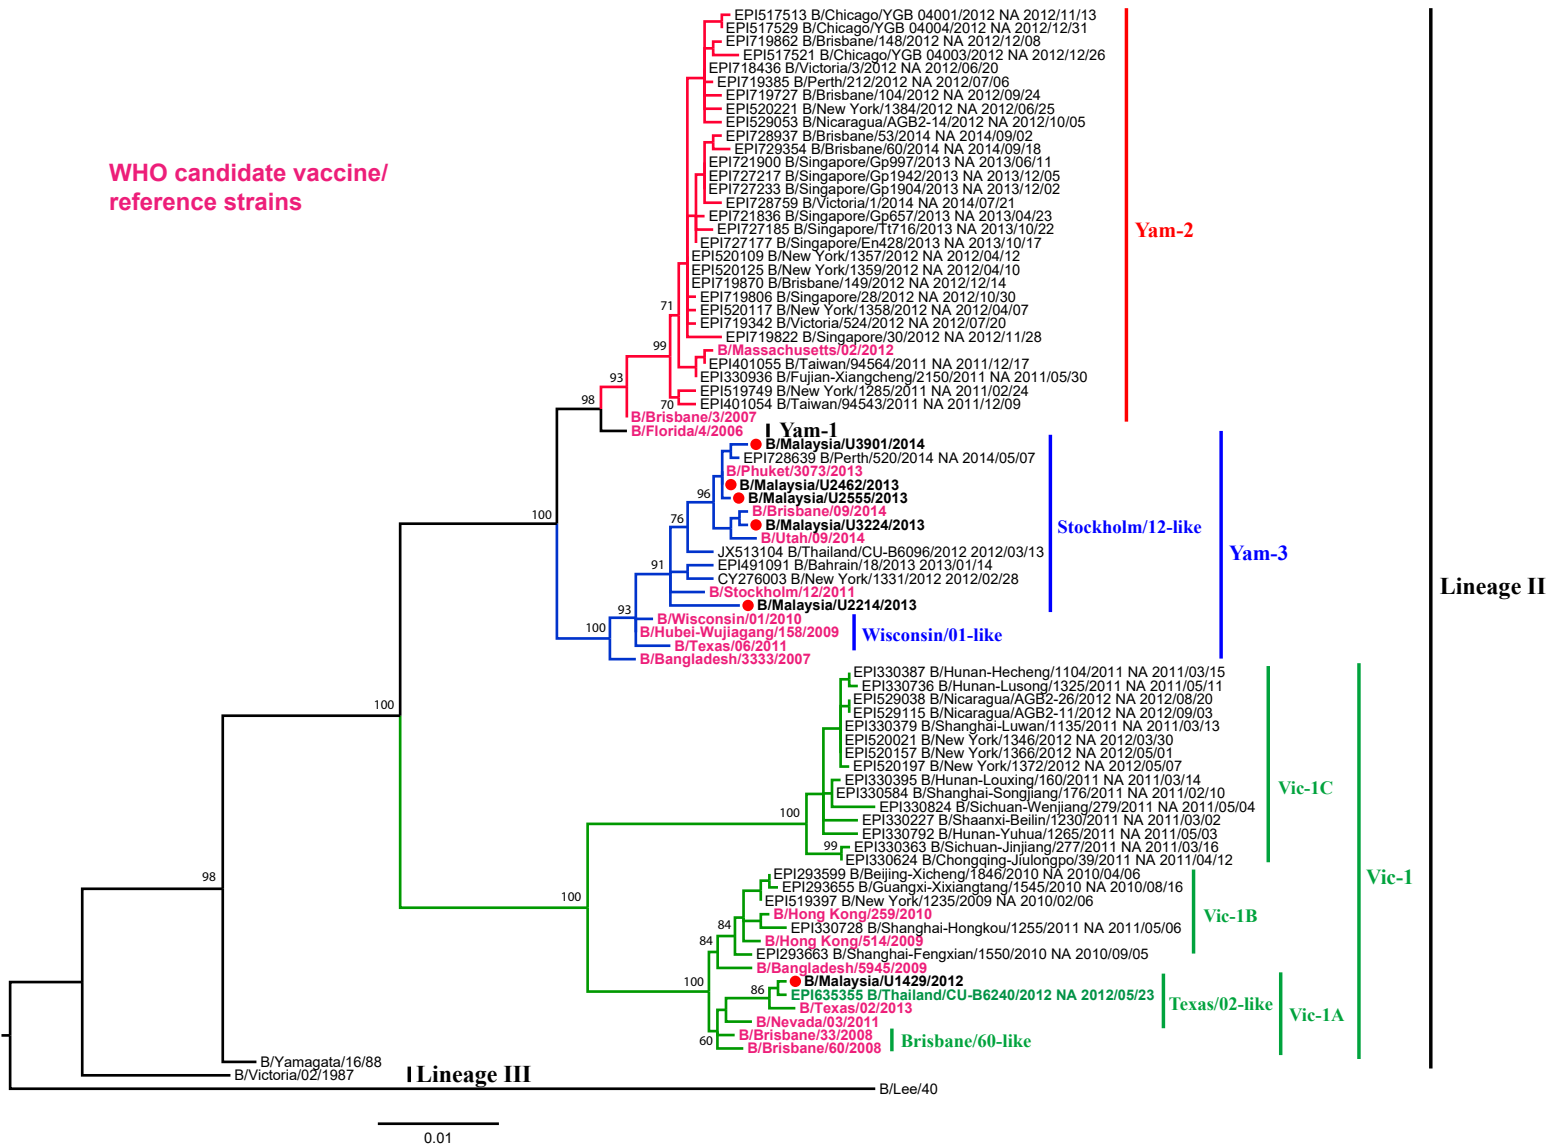

# ML Tree - PB1 (2259bp)

WHO candidate vaccine/  
reference strains

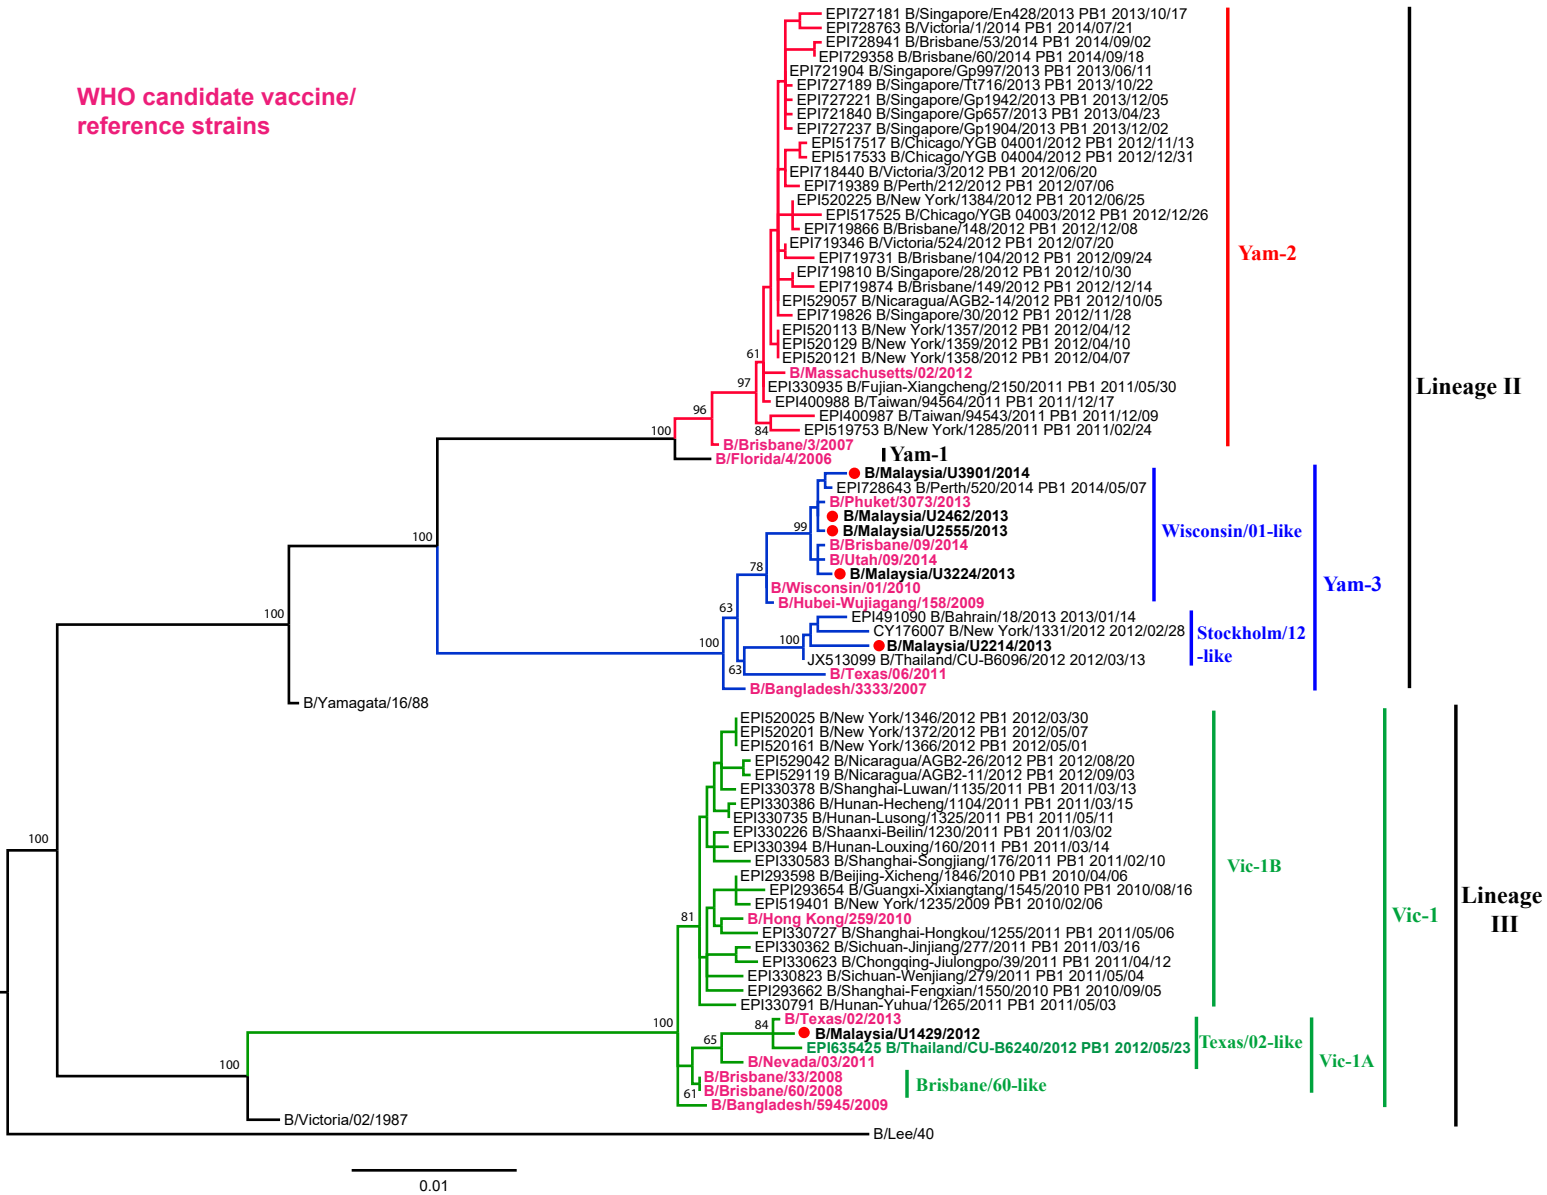

# ML Tree - PB2 (2313bp)

WHO candidate vaccine/  
reference strains

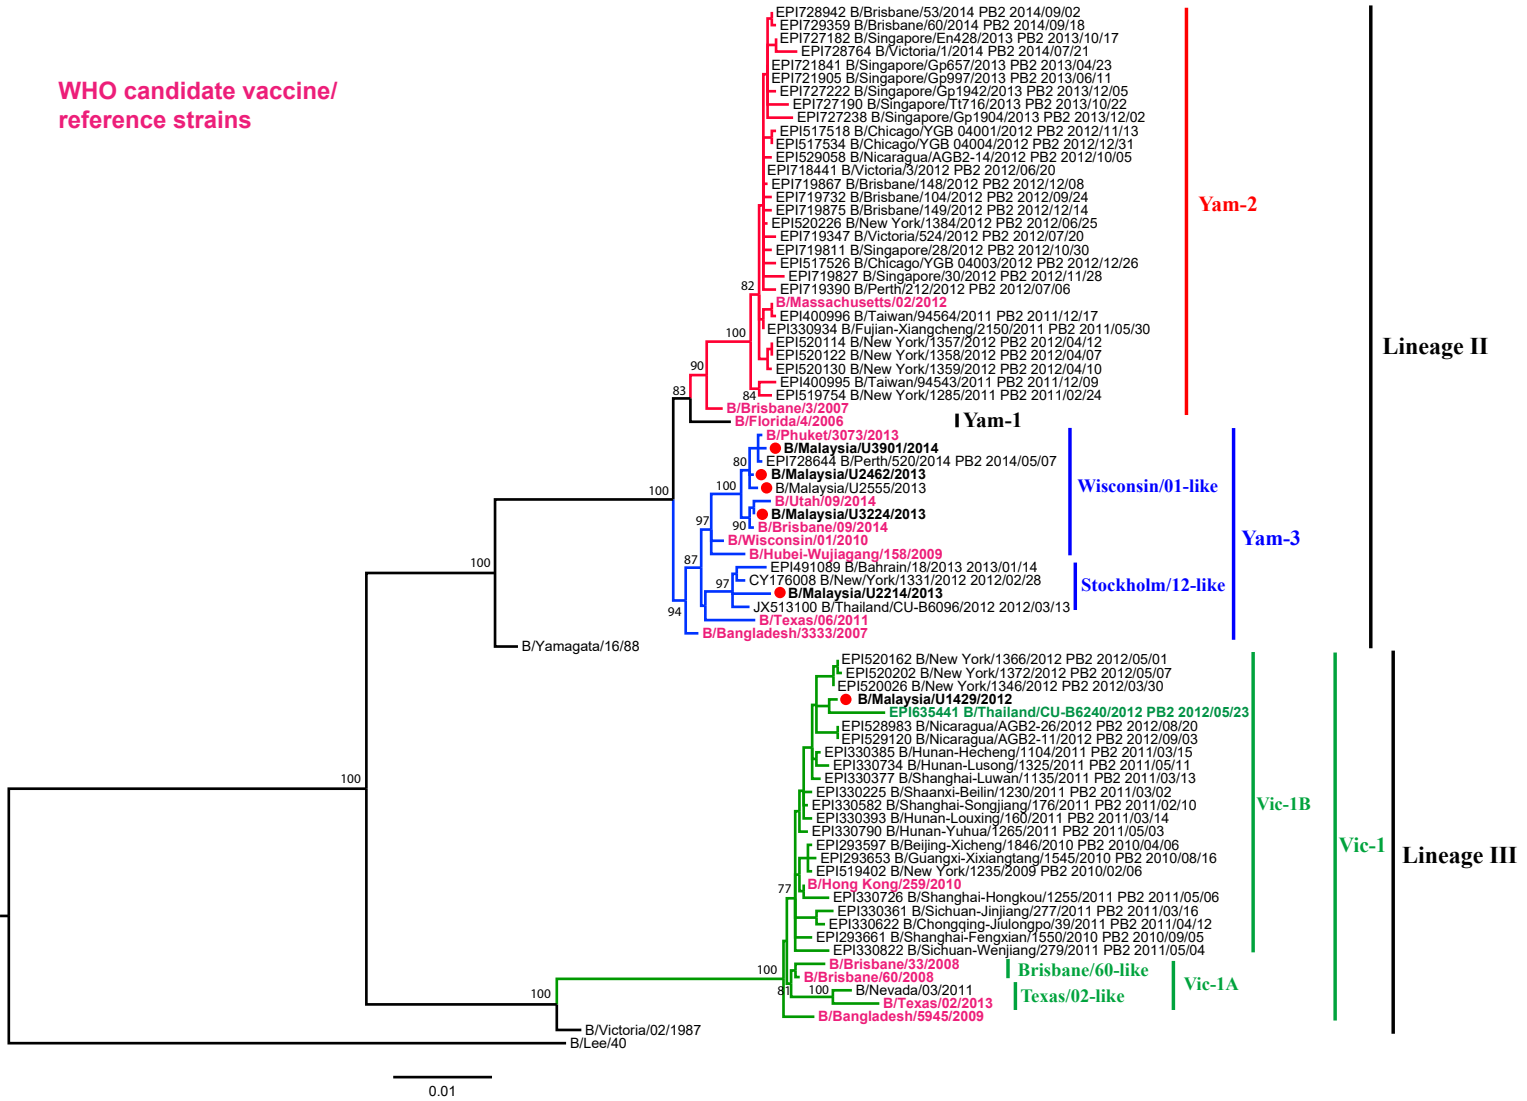

# ML Tree - PA (2181bp)

WHO candidate vaccine/  
reference strains

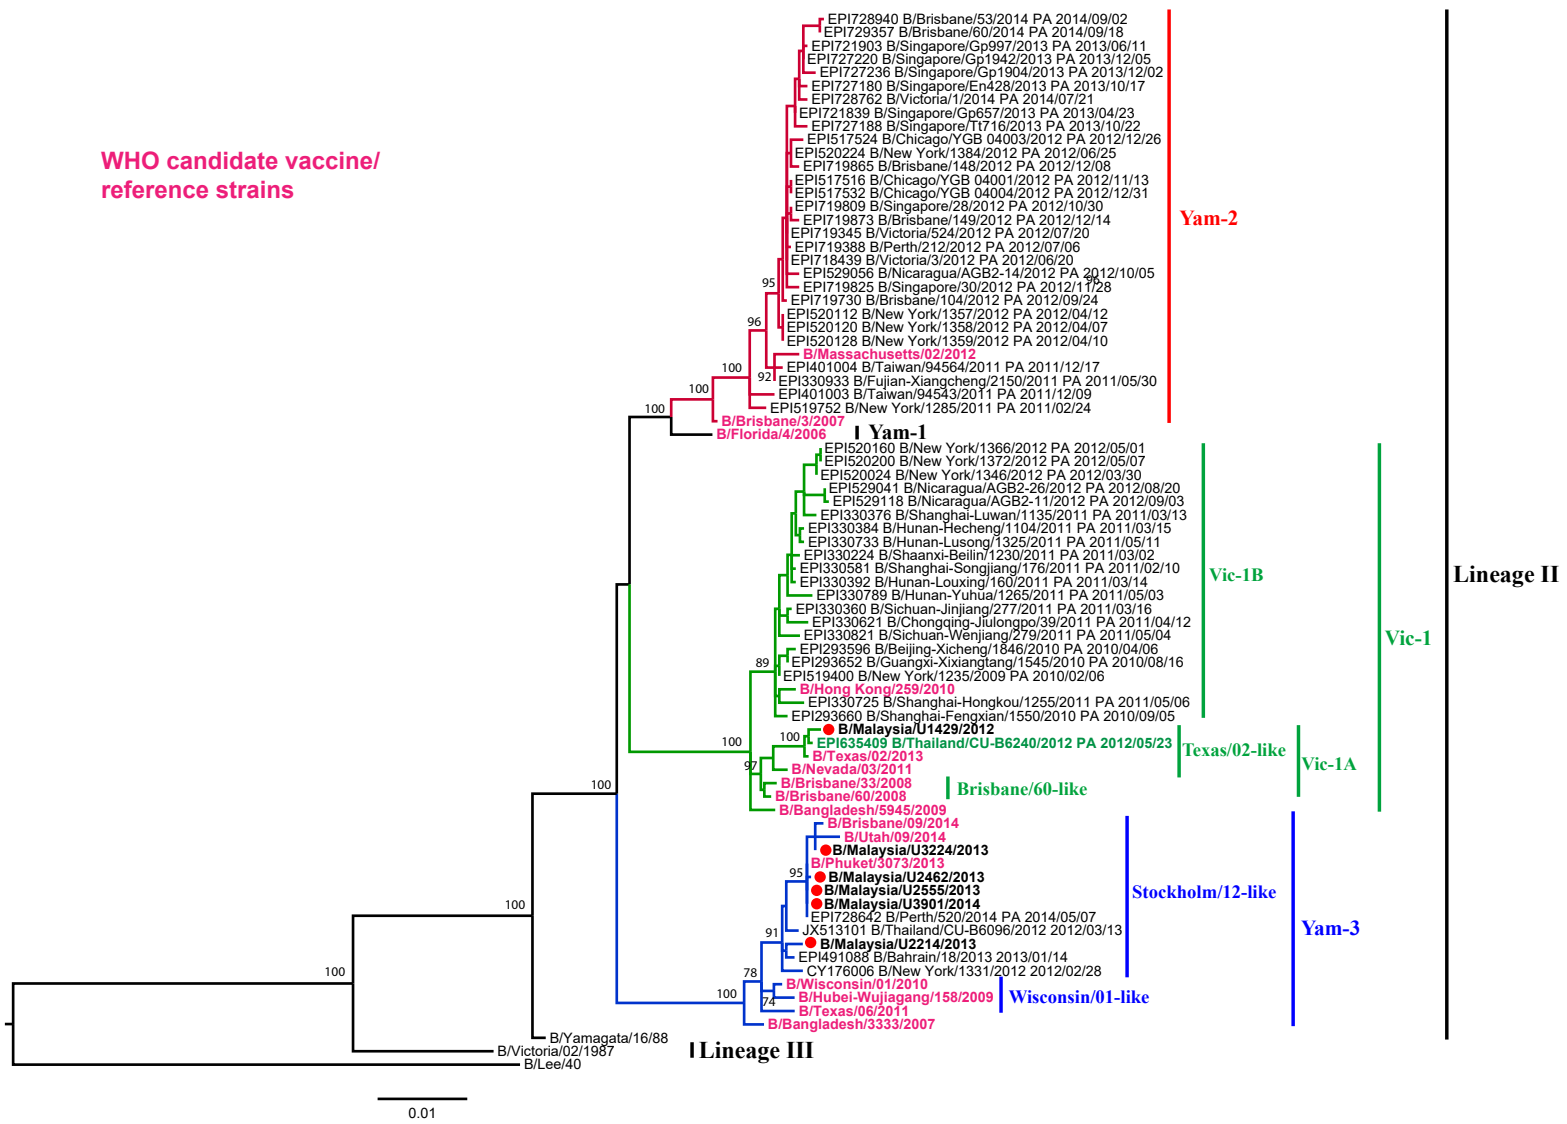

0.01

Lineage II

I Lineage III

Yam-2

I Yam-1

Vic-1B

Vic-1

Texas/02-like

Vic-1A

Brisbane/60-like

Stockholm/12-like

Yam-3

Wisconsin/01-like

# ML Tree - NP (1683bp)

WHO candidate vaccine/  
reference strains

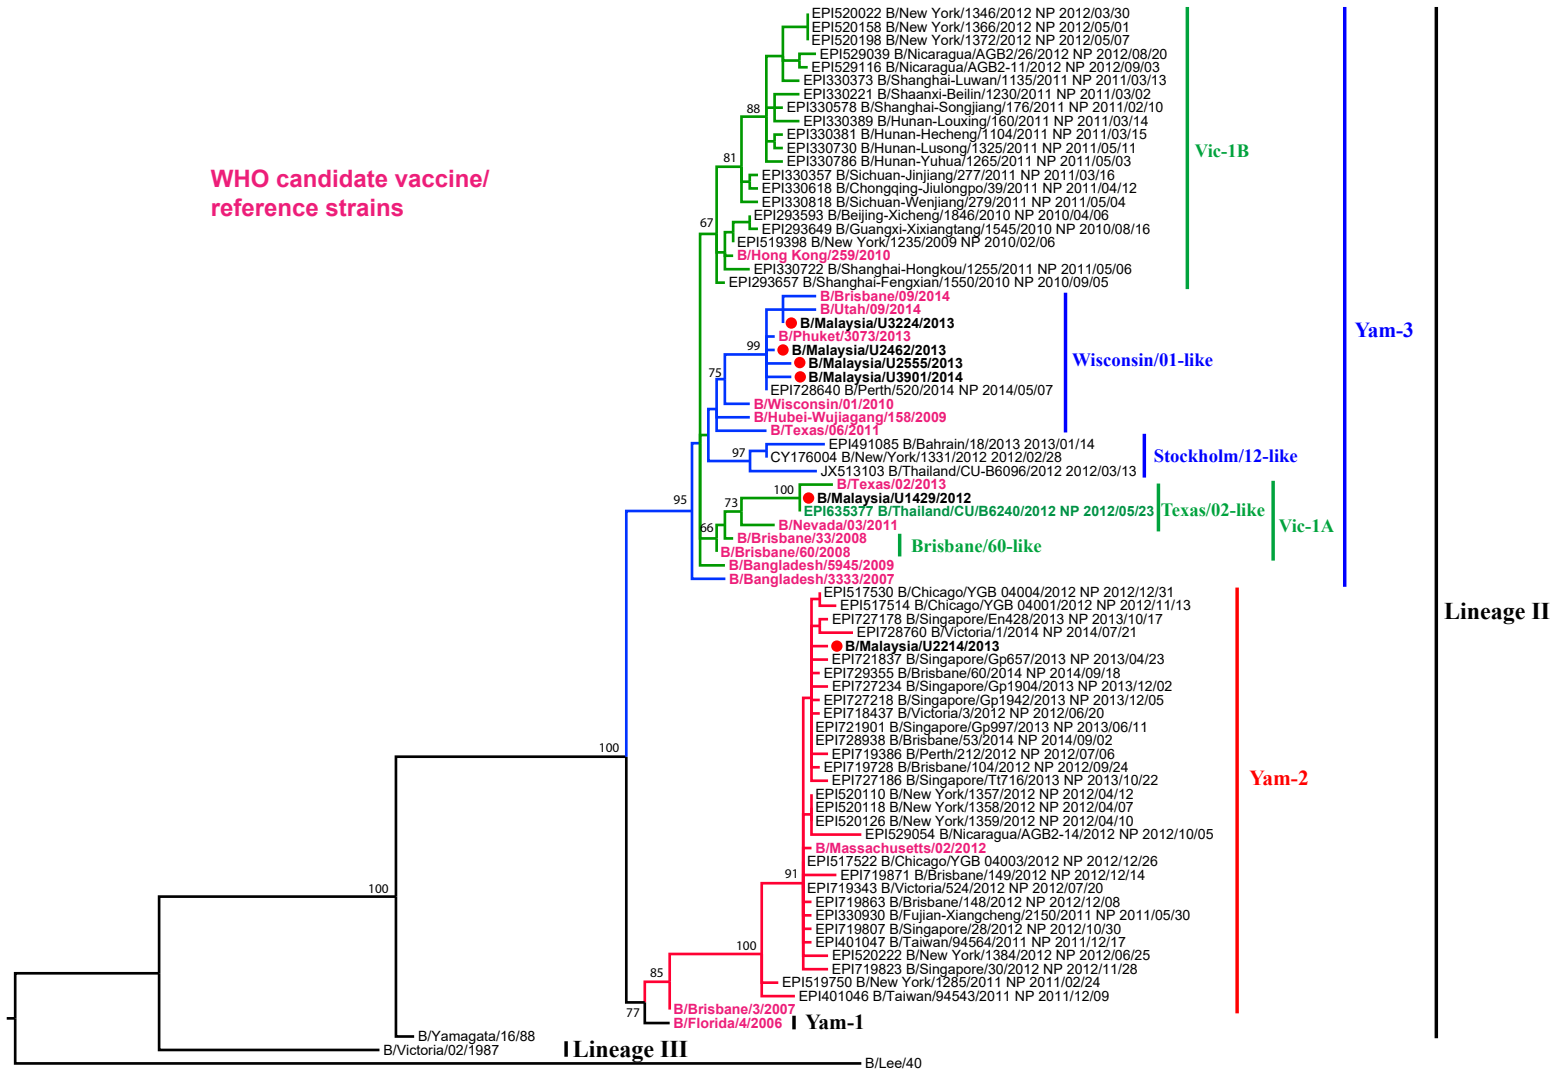

0.01

# ML Tree - MP (1076bp)

WHO candidate vaccine/  
reference strains

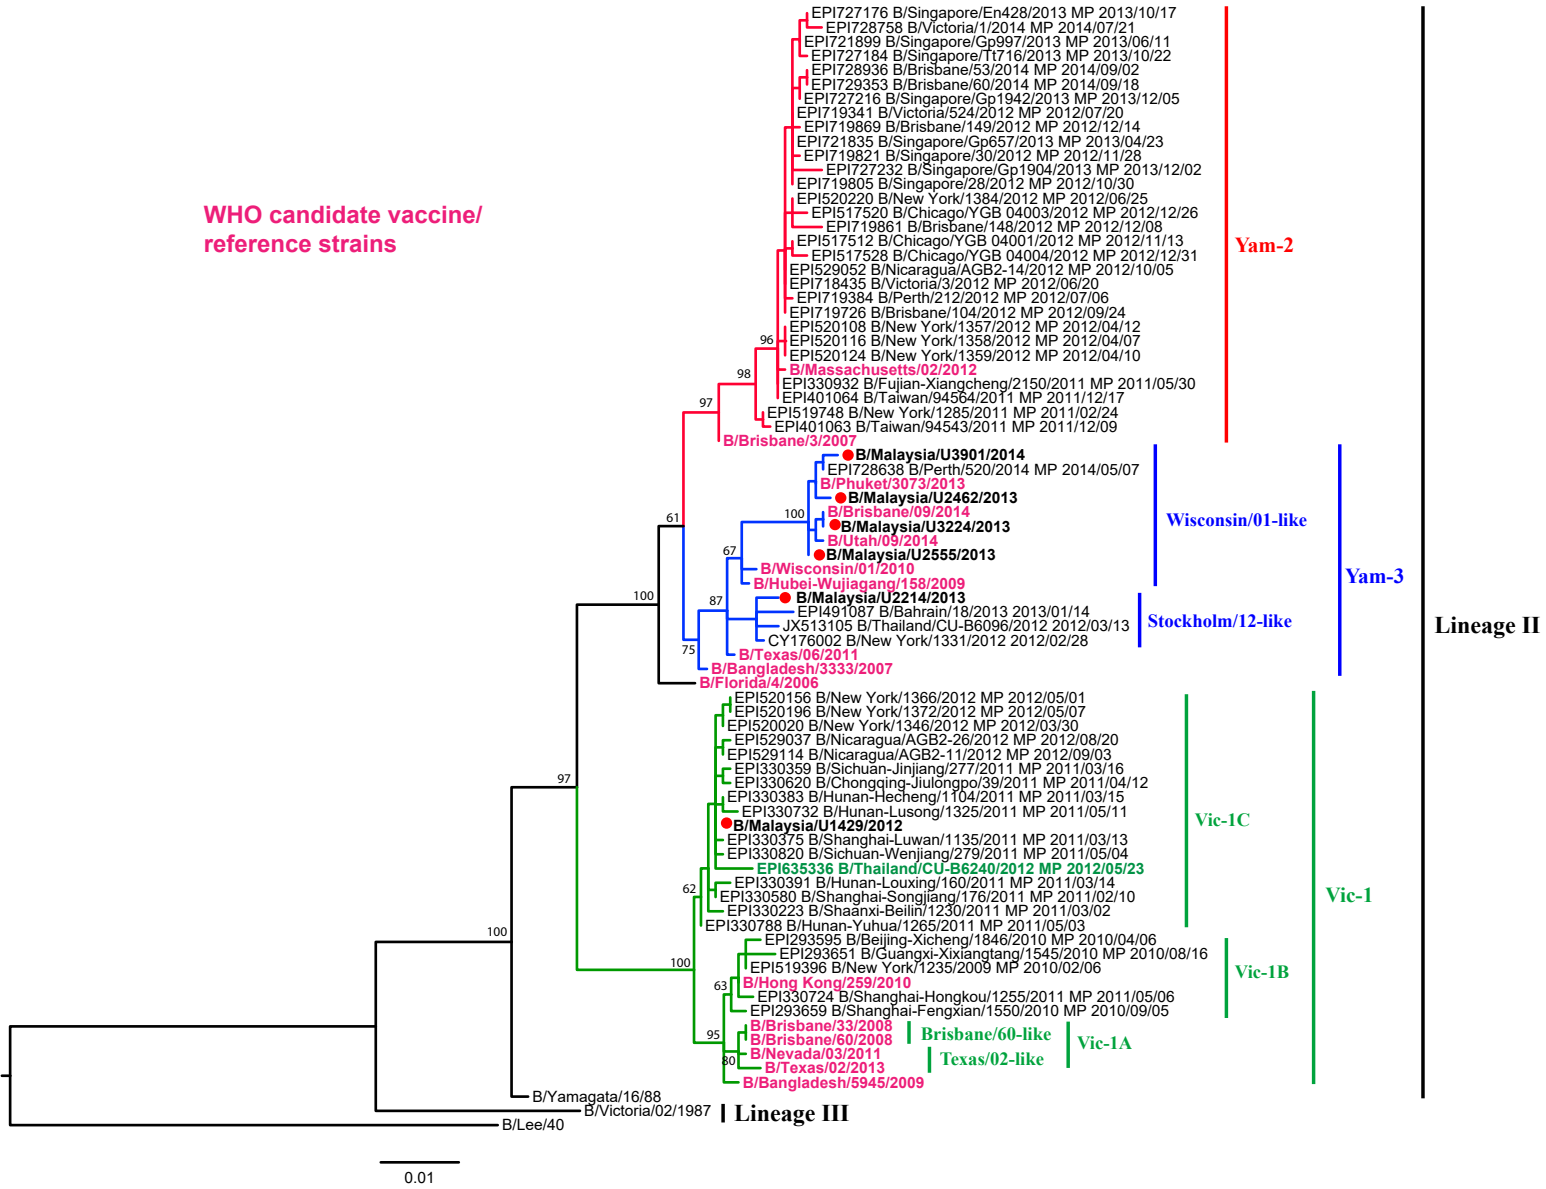

# ML Tree - NS (1024bp)

WHO candidate vaccine/  
reference strains

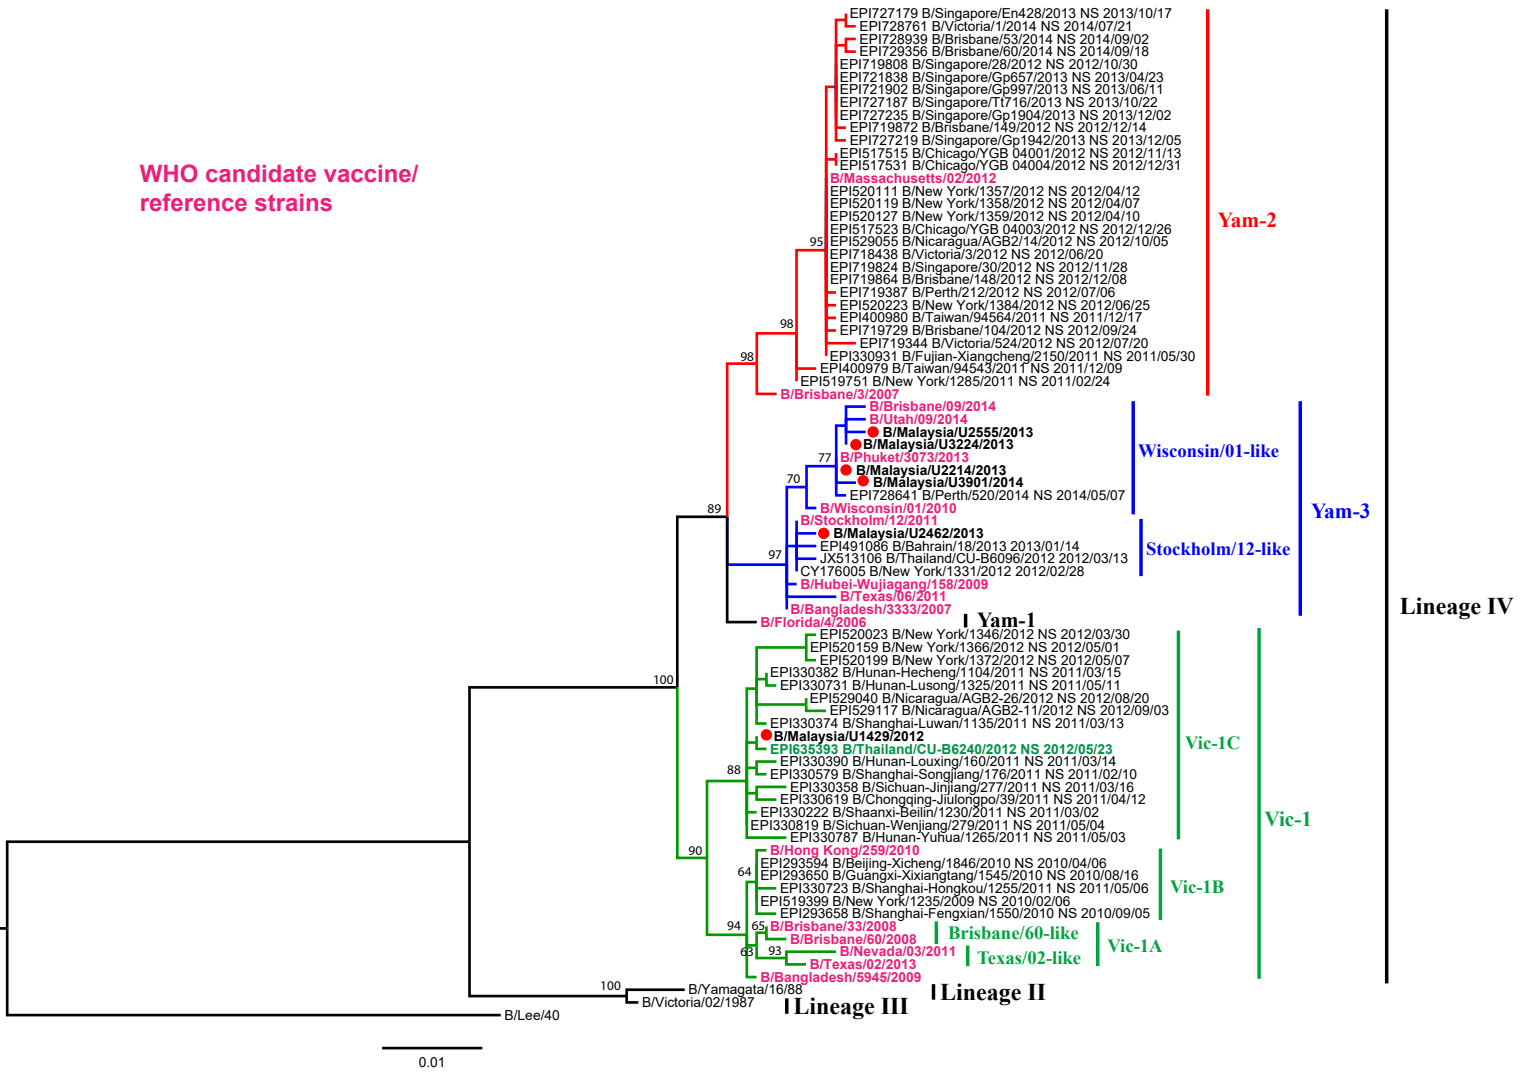

Supplement: pone.0170610.s003.pdf [file pone.0170610.s003.pdf]
